# Supplementary material for: Five water-stable luminescent CdII-based metal–organic frameworks as sensors for highly sensitive and selective detection of acetylacetone, Fe3+ and Cr2O72− ions
Source: Royal Society of Chemistry journal article supplement (doi:10.1039/d0ce00140f), 2020-01-01
Supplement: d0ce00140f1.pdf [file d0ce00140f1.pdf]

Supplementary Material (ESI) for *CrystEngComm* 2020.

Five water-stable luminescent Cd<sup>II</sup>-based metal-organic frameworks as  
sensors for highly sensitive and selective detection of acetylacetone, Fe<sup>3+</sup>  
and Cr<sub>2</sub>O<sub>7</sub><sup>2-</sup> ions

Yong-Sheng Shi<sup>a</sup>, Dong Liu<sup>a</sup>, Lianshe Fu<sup>b</sup>, Yue-Hua Li<sup>a</sup>, Gui-Ying Dong<sup>a\*</sup>

<sup>a</sup>*College of Chemical Engineering, Hebei Key Laboratory for Environment Photocatalytic and  
Electrocatalytic Materials, North China University of Science and Technology, No. 21 Bohai  
Road, Caofeidian new-city, Tangshan, Hebei, 063210, P. R. China*

<sup>b</sup>*Department of Physics and CICECO-Aveiro Institute of Materials, University of Aveiro, 3810-  
193 Aveiro, Portugal*

\*Corresponding author: Gui-Ying Dong

Fax: +86-0315-8805462. Tel: +86-0315-8805460

E-mail: [tsdgying@126.com](mailto:tsdgying@126.com).

Table Titles:

Table S1. Crystal and refinement data for Cd-MOFs **1–5**

Table S2. Selected bond lengths [Å] and angles [°] for complexes Cd-MOFs **1–5**

Table S3. Hydrogen bonds (Å) and angles (°) for the **1/2**.

Table S4. Comparison of the sensitivities of **1** and **2** for acac with related MOFs

Table S5. Comparison of the sensitivities of **2** with previously reported MOFs to Fe<sup>3+</sup>  
ions

Table S6. Comparison of the sensitivities of **3** with previously reported MOFs to Fe<sup>3+</sup>  
ions

**Table S1a** Crystal data and structure refinements for the **1–3**

| Cd-MOFs                                                                                    | <b>1</b>                                                                        | <b>2</b>                                                                                      | <b>3</b>                                                                                            |
|--------------------------------------------------------------------------------------------|---------------------------------------------------------------------------------|-----------------------------------------------------------------------------------------------|-----------------------------------------------------------------------------------------------------|
| Chemical formula                                                                           | C <sub>26</sub> H <sub>20</sub> CdCl <sub>2</sub> N <sub>4</sub> O <sub>4</sub> | C <sub>54</sub> H <sub>44</sub> Cd <sub>2</sub> Cl <sub>4</sub> N <sub>8</sub> O <sub>8</sub> | C <sub>45</sub> H <sub>34.5</sub> Cd <sub>2</sub> Cl <sub>4</sub> N <sub>6</sub> O <sub>10.25</sub> |
| Formula weight                                                                             | 635.76                                                                          | 1299.57                                                                                       | 1216.94                                                                                             |
| Crystal system                                                                             | monoclinic                                                                      | Monoclinic                                                                                    | Monoclinic                                                                                          |
| Space group                                                                                | <i>P2<sub>1</sub>/n</i>                                                         | <i>P<sub>2</sub>/n</i>                                                                        | <i>P2<sub>1</sub>/n</i>                                                                             |
| <i>a</i> (Å)                                                                               | 9.304(2)                                                                        | 14.993(3)                                                                                     | 18.478(4)                                                                                           |
| <i>b</i> (Å)                                                                               | 15.944(3)                                                                       | 21.331(4)                                                                                     | 9.489(2)                                                                                            |
| <i>c</i> (Å)                                                                               | 17.445(4)                                                                       | 16553(2)                                                                                      | 26.833(4)                                                                                           |
| $\alpha$ (°)                                                                               | 90                                                                              | 90                                                                                            | 90                                                                                                  |
| $\beta$ (°)                                                                                | 94.552(2)                                                                       | 98.640(2)                                                                                     | 91.811(2)                                                                                           |
| $\gamma$ (°)                                                                               | 90                                                                              | 90                                                                                            | 90                                                                                                  |
| <i>V</i> (Å <sup>3</sup> )                                                                 | 2579.84(11)                                                                     | 5224.19(16)                                                                                   | 4702.54(16)                                                                                         |
| <i>Z</i>                                                                                   | 4                                                                               | 4                                                                                             | 4                                                                                                   |
| <i>D</i> <sub>calcd</sub> (g/cm <sup>3</sup> )                                             | 1.637                                                                           | 1.652                                                                                         | 1.719                                                                                               |
| Absorption coefficient, mm <sup>-1</sup>                                                   | 1.094                                                                           | 1.082                                                                                         | 1.196                                                                                               |
| <i>F</i> (000)                                                                             | 1272                                                                            | 2608                                                                                          | 2370                                                                                                |
| Crystal size, mm                                                                           | 0.27 x 0.26 x 0.23                                                              | 0.24 x 0.22 x 0.20                                                                            | 0.26 x 0.22 x 0.21                                                                                  |
| $\theta$ range, deg                                                                        | 4.684 – 61.052                                                                  | 4.412 – 61.112                                                                                | 4.41 – 61.152                                                                                       |
| Index range <i>h, k, l</i>                                                                 | -13/11, -22/22, -24/23                                                          | -21/21, -30/29, -15/23                                                                        | -25/25, -12/13, -36/35                                                                              |
| Reflections collected                                                                      | 37137                                                                           | 77199                                                                                         | 70559                                                                                               |
| Independent reflections ( <i>R</i> <sub>int</sub> )                                        | 7603 (0.0380)                                                                   | 15324 (0.0595)                                                                                | 13816 (0.0376)                                                                                      |
| Data/restraint/parameters                                                                  | 7603/0/334                                                                      | 15324/0/687                                                                                   | 13816/82/623                                                                                        |
| Goodness-of-fit on <i>F</i> <sup>2</sup>                                                   | 1.023                                                                           | 1.031                                                                                         | 0.989                                                                                               |
| Final <i>R</i> <sub>1</sub> , <i>wR</i> <sub>2</sub> ( <i>I</i> > 2 $\sigma$ ( <i>I</i> )) | 0.0300, 0.0690                                                                  | 0.0472, 0.1192                                                                                | 0.0363, 0.0796                                                                                      |
| Largest diff. peak and hole                                                                | 0.68, -0.66                                                                     | 2.11, -1.39                                                                                   | 1.17, -0.96                                                                                         |

**Table S1b** Crystal data and structure refinements for the **4** and **5**

| Cd-MOFs                                                                                    | <b>4</b>                                                                        | <b>5</b>                                                                          |
|--------------------------------------------------------------------------------------------|---------------------------------------------------------------------------------|-----------------------------------------------------------------------------------|
| Chemical formula                                                                           | C <sub>38</sub> H <sub>30</sub> CdCl <sub>2</sub> N <sub>6</sub> O <sub>4</sub> | C <sub>20</sub> H <sub>17</sub> Cd <sub>0.5</sub> ClN <sub>3</sub> O <sub>2</sub> |
| Formula weight                                                                             | 870.33                                                                          | 423.02                                                                            |
| Crystal system                                                                             | Triclinic                                                                       | monoclinic                                                                        |
| Space group                                                                                | <i>P</i> $\bar{1}$                                                              | <i>C</i> 2/ <i>c</i>                                                              |
| <i>a</i> (Å)                                                                               | 9.628(6)                                                                        | 13.1061(5)                                                                        |
| <i>b</i> (Å)                                                                               | 10.279(4)                                                                       | 16.0142(5)                                                                        |
| <i>c</i> (Å)                                                                               | 18.731(9)                                                                       | 17.5495(7)                                                                        |
| $\alpha$ (°)                                                                               | 91.228(4)                                                                       | 90                                                                                |
| $\beta$ (°)                                                                                | 101.525(4)                                                                      | 97.736(4)                                                                         |
| $\gamma$ (°)                                                                               | 90.458(4)                                                                       | 90                                                                                |
| <i>V</i> (Å <sup>3</sup> )                                                                 | 1815.83(16)                                                                     | 1051.6(2)                                                                         |
| <i>Z</i>                                                                                   | 2                                                                               | 8                                                                                 |
| <i>D</i> <sub>calcd</sub> (g/cm <sup>3</sup> )                                             | 1.564                                                                           | 1.540                                                                             |
| Absorption coefficient, mm <sup>-1</sup>                                                   | 0.805                                                                           | 0.796                                                                             |
| <i>F</i> (000)                                                                             | 870                                                                             | 1720                                                                              |
| Crystal size, mm                                                                           | 0.26 x 0.23 x 0.22                                                              | 0.20 x 0.16 x 0.12                                                                |
| $\theta$ range, deg                                                                        | 5.326-62.064                                                                    | 4.452-61.162                                                                      |
| Index range <i>h, k, l</i>                                                                 | -13/13, -14/14, -26/26                                                          | -18/18, -22/22, -24/24                                                            |
| Reflections collected                                                                      | 42306                                                                           | 26620                                                                             |
| Independent reflections ( <i>R</i> <sub>int</sub> )                                        | 9988(0.0763)                                                                    | 5301 (0.0524)                                                                     |
| Data/restraint/parameters                                                                  | 9988 / 0 / 460                                                                  | 5301 / 639 / 240                                                                  |
| Goodness-of-fit on <i>F</i> <sup>2</sup>                                                   | 1.036                                                                           | 1.048                                                                             |
| Final <i>R</i> <sub>1</sub> , <i>wR</i> <sub>2</sub> ( <i>I</i> > 2 $\sigma$ ( <i>I</i> )) | 0.0735, 0.1846                                                                  | 0.0458, 0.1295                                                                    |
| Largest diff. peak and hole                                                                | 2.31, -0.89                                                                     | 0.85, -1.13                                                                       |

**Table S2a** Selected Bond Lengths [Å] and Angles [°] for the **1** and **2**

| Parameter   | Value      | Parameter   | Value      |
|-------------|------------|-------------|------------|
| <b>1</b>    |            |             |            |
| Cd1–O1/O2   | 2.201(2)   | Cd1–N1      | 2.236(2)   |
| Cd1–O3B/O4B | 2.227(2)   | Cd1–N4A     | 2.249(2)   |
| O1–Cd1–O4B  | 121.17(7)  | O1–Cd1–N1   | 121.27(6)  |
| O1–Cd1–N4A  | 99.10(6)   | O4B–Cd1–N1  | 94.50(6)   |
| O4B–Cd1–N4A | 111.32(7)  | N1–Cd1–N4A  | 109.72(7)  |
| <b>2</b>    |            |             |            |
| Cd1–O1/O1A  | 2.249(2)   | Cd1–O2/O2A  | 2.615(2)   |
| Cd1–N1/N1A  | 2.099(2)   | Cd2–O5/O5D  | 2.174(2)   |
| Cd2–N3/N3D  | 2.221(3)   | Cd3–O7/O7F  | 2.175(2)   |
| Cd3–N5/N5F  | 2.210(3)   | Cd4–O4B/O4C | 2.407(2)   |
| Cd4–O3B/O3C | 2.341(2)   | Cd4–N8/N8G  | 2.239(2)   |
| O4B–Cd4–O4C | 128.09(11) | N8–Cd4–O4B  | 99.64(9)   |
| O3C–Cd4–O4C | 55.34(8)   | N8–Cd4–O4C  | 114.79(8)  |
| O3B–Cd4–O4B | 55.34(8)   | N8–Cd4–O3B  | 168.92(9)  |
| O3C–Cd4–O4B | 85.06(8)   | N8G–Cd4–O3C | 91.23(9)   |
| O3B–Cd4–O4C | 85.06(8)   | N8–Cd4–O3B  | 91.23(9)   |
| O3B–Cd4–O3C | 83.16(12)  | N8G–Cd4–O3B | 168.92(9)  |
| N8G–Cd4–O4B | 114.79(8)  | N8G–Cd4–N8  | 95.81(13)  |
| N8G–Cd4–O4C | 99.64(9)   | O1–Cd1–N1A  | 116.89(8)  |
| O1A–Cd1–O1  | 122.62(12) | O1–Cd1–N1   | 100.00(8)  |
| O1–Cd1–O2   | 53.12(7)   | O2–Cd1–O2A  | 82.68(11)  |
| O1A–Cd1–O2A | 53.12(7)   | N1–Cd1–O2A  | 94.99(8)   |
| O1A–Cd1–O2  | 83.06(8)   | N1A–Cd1–O2A | 153.13(8)  |
| O1–Cd1–O2A  | 83.06(8)   | N1A–Cd1–O2  | 94.98(8)   |
| O1A–Cd1–N1  | 116.89(8)  | N1–Cd1–O2   | 153.13(8)  |
| O1A–Cd1–N1A | 100.00(8)  | N1–Cd1–N1A  | 98.63(13)  |
| O7F–Cd3–O7  | 102.13(12) | O5–Cd2–O5D  | 107.25(12) |
| O7–Cd3–N5F  | 118.60(9)  | O5–Cd2–N3D  | 119.32(10) |
| O7F–Cd3–N5F | 105.67(9)  | O5D–Cd2–N3D | 102.00(9)  |
| O7F–Cd3–N5  | 118.60(9)  | O5–Cd2–N3   | 101.99(9)  |
| O7–Cd3–N5   | 105.67(9)  | O5D–Cd2–N3  | 119.32(10) |
| N5–Cd3–N5F  | 106.88(14) | N3D–Cd2–N3  | 107.95(15) |

symmetry code: A:  $-x, 1-y, 1-z$ ; B:  $0.5-x, -0.5+y, 0.5-z$  for **1**; A:  $0.5-x, y, 0.5-z$ ; B:  $1-x, -y, 1-z$ ; C:  $0.5+x, -y,$

$1.5+z$ ; D:  $0.5-x, y, 1.5-z$ ; F:  $0.5-x, y, 2.5-z$ ; G:  $1.5-x, y, 2.5-z$  for **2**.

**Table S2b** Selected bond lengths [Å] and angles [°] for Cd-MOFs **3–4**.

| Parameter  | Value      | Parameter   | Value      |
|------------|------------|-------------|------------|
| <b>3</b>   |            |             |            |
| Cd1–O1     | 2.265(2)   | Cd1–N6B     | 2.392(2)   |
| Cd1–O2     | 2.629(2)   | Cd2–N2      | 2.275(2)   |
| Cd1–O3     | 2.328(2)   | Cd2–O5      | 2.275(4)   |
| Cd1–O4     | 2.5263(2)  | Cd2–O6      | 2.581(5)   |
| Cd1–O4A    | 2.4207(2)  | Cd2–O7C     | 2.361(4)   |
| Cd1–N1     | 2.324(2)   | Cd2–O8C     | 2.420(5)   |
| Cd2–N4     | 2.233(2)   | O4A–Cd1–O4  | 68.47(7)   |
| O1–Cd1–O2  | 52.49(8)   | N1–Cd1–O2   | 89.64(7)   |
| O1–Cd1–O3  | 126.49(9)  | N1–Cd1–O3   | 94.20(8)   |
| O1–Cd1–O4  | 82.31(8)   | N1–Cd1–O4A  | 80.81(7)   |
| O1–Cd1–O4A | 88.60(8)   | N1–Cd1–O4   | 128.04(7)  |
| O1–Cd1–N1  | 139.18(9)  | N1–Cd1–N6B  | 94.81(9)   |
| O1–Cd1–N6B | 93.54(9)   | N6B–Cd1–O2  | 80.96(8)   |
| O3–Cd1–O2  | 163.73(8)  | N4–Cd2–O7C  | 98.68(12)  |
| O3–Cd1–O4  | 53.38(7)   | N4–Cd2–O8C  | 130.47(18) |
| O3–Cd1–O4A | 99.20(8)   | O5–Cd2–O6   | 51.45(12)  |
| O3–Cd1–N6B | 82.96(9)   | O5–Cd2–O7C  | 83.87(17)  |
| N2–Cd2–O5  | 106.83(16) | O5–Cd2–O8C  | 91.41(19)  |
| N2–Cd2–O6  | 101.8(2)   | O7C–Cd2–O6  | 115.9(2)   |
| N2–Cd2–O7C | 137.37(11) | O7C–Cd2–O8C | 53.56(11)  |
| N2–Cd2–O8C | 84.49(10)  | O8C–Cd2–O6  | 142.7(2)   |
| N4–Cd2–N2  | 104.55(8)  | N4–Cd2–O6   | 83.96(13)  |
| N4–Cd2–O5  | 129.38(13) |             |            |
| <b>4</b>   |            |             |            |
| Cd1–O2     | 2.398(4)   | Cd1–N3C     | 2.383(4)   |
| Cd1–N1     | 2.327(4)   | Cd1–N6D     | 2.368(4)   |
| Cd1–O1     | 2.413(4)   | Cd1–O3      | 2.233(5)   |
| O2–Cd1–O1  | 54.44(14)  | N6D–Cd1–O1  | 87.55(16)  |
| N1–Cd1–O2  | 146.49(14) | N6D–Cd1–N3C | 169.98(15) |
| N1–Cd1–O1  | 93.46(14)  | O3–Cd1–O2   | 114.9(2)   |
| N1–Cd1–N3C | 87.02(15)  | O3–Cd1–N1   | 97.8(2)    |
| N1–Cd1–N6D | 90.66(16)  | O3–Cd1–O1   | 168.5(2)   |
| N3C–Cd1–O2 | 80.24(15)  | O3–Cd1–N3C  | 100.0(2)   |
| N3C–Cd1–O1 | 82.87(15)  | O3–Cd1–N6D  | 90.0(2)    |
| N6D–Cd1–O2 | 96.56(16)  |             |            |

symmetry code: A:  $-x, 2-y, 1-z$ , B:  $1-x, 2-y, 1-z$ , C:  $0.5+x, 0.5-y, 0.5+z$  for **3**; C:  $1+x, y, z$ ; D:  $x, 1+y, z$ . for **4**.

**Table S2c** Selected bond lengths [ $\text{\AA}$ ] and angles [ $^\circ$ ] for Cd-MOFs **5**.

| Parameter   | Value      | Parameter   | Value      |
|-------------|------------|-------------|------------|
| <b>5</b>    |            |             |            |
| Cd1–N1/N1A  | 2.283(2)   | Cd1–O1/O1A  | 2.382(2)   |
| Cd1–O2/O2A  | 2.382(2)   | N11–Cd1–O2A | 133.14(12) |
| N1A–Cd1–N1  | 89.91(13)  | N1–Cd1–O2A  | 93.91(10)  |
| N1–Cd1–O1A  | 135.46(12) | O1A–Cd1–O1  | 114.2(2)   |
| N1A–Cd1–O1  | 135.46(12) | O2A–Cd1–O1A | 53.56(11)  |
| N11–Cd1–O1A | 93.20(10)  | O2–Cd1–O1   | 53.56(10)  |
| N1–Cd1–O1   | 93.20(10)  | O2–Cd1–O1A  | 90.98(15)  |
| N1–Cd1–O2   | 133.14(12) | O2A–Cd1–O1  | 90.98(15)  |
| N1A–Cd1–O2  | 93.91(10)  | O2–Cd1–O2A  | 115.8(2)   |

symmetry code: A:1– $x$ ,  $y$ , 1.5– $z$  for **5**.

**Table S3** Hydrogen bonds (Å) and angles (°) for the **1/2**

| Donor–H···acceptor | D–H  | H···A | D···A    | Angle |
|--------------------|------|-------|----------|-------|
| <b>1</b>           |      |       |          |       |
| N2C–H2C ···O3C     | 0.86 | 1.94  | 2.743(3) | 156   |
| N3C–H3C ···O2C     | 0.86 | 1.98  | 2.770(3) | 153   |
| <b>2</b>           |      |       |          |       |
| N2H–H3H ···O3H     | 0.86 | 1.89  | 2.735(3) | 167   |
| N4I–H3I ···O2I     | 0.86 | 1.96  | 2.758(4) | 154   |
| N6J–H6J ···O6J     | 0.86 | 1.95  | 2.745(4) | 153   |
| N7J–H7J ···O8J     | 0.86 | 2.04  | 2.853(3) | 156   |

Symmetry codes for **1**: C = 1-x, 1-y, 1-z; Symmetry codes for **2**: H = -x-, -y, -z; I = 0.5+x, -y, 0.5+z; J = 1-x, 1-y, 2-z.



**Table S4.** Comparison of the sensitivities of **1** and **2** for acac with related MOFs

| MOFs                                                                                           | LOD/M                  | Ref       |
|------------------------------------------------------------------------------------------------|------------------------|-----------|
| $\{[(\text{CH}_3)_2\text{NH}_2][\text{Zn}(\text{FDA})(\text{BTZ})_2]\}_n$                      | $6.47 \times 10^{-7}$  | [9]       |
| $\{[\text{Zn}_3(\text{bbib})_2(\text{ndc})_3] \cdot 2\text{DMF} \cdot 2\text{H}_2\text{O}\}_n$ | $0.10 \times 10^{-7}$  | [5]       |
| $\{[\text{Co}_{1.5}(\text{TBIP})_{1.5}(\text{L})] \cdot 0.5\text{H}_2\text{O}\}_n$             | $0.023 \times 10^{-6}$ | [6]       |
| <b>2</b>                                                                                       | $6.36 \times 10^{-7}$  | This work |
| <b>3</b>                                                                                       | $8.76 \times 10^{-7}$  | This work |

H<sub>2</sub>FDA = furan-2,5-dicarboxylic acid, HBTZ = 1*H*-benzotriazole, bbib = 1,3-bis(benzimidazolyl)benzene, H<sub>2</sub>ndc = 1,4-naphthalenedicarboxylic acid, L = 1,3-bis(5,6-dimethylbenzimidazol-1-yl)propane, and H<sub>2</sub>TBIP = 5-tert-butylisophthalic acid.

**Table S5.** Comparison of the sensitivities of **2** with previously reported MOFs to Fe<sup>3+</sup>

ions

| MOFs                                                                                                     | LOD/M                   | Ref       |
|----------------------------------------------------------------------------------------------------------|-------------------------|-----------|
| {[Zn(bbib)(oba)]·solvents} <sub>n</sub>                                                                  | 3.31×10 <sup>-6</sup>   | [2]       |
| [Zn <sub>5</sub> (hfipbb) <sub>4</sub> (trz) <sub>2</sub> (H <sub>2</sub> O) <sub>2</sub> ] <sub>n</sub> | 0.2×10 <sup>-3</sup>    | [11]      |
| [Zn <sub>2</sub> L <sub>2</sub> ]·2DMF·2MeOH                                                             | 0.1×10 <sup>-3</sup>    | [1]       |
| <b>2</b>                                                                                                 | 6.42×10 <sup>-5</sup> M | This work |

bbib = 1,3-bis(benzimidazolyl)benzene, oba = 4,4'-oxybisbenzoate; H<sub>2</sub>hfipbb =

4,4'-(hexafluoroisopropylidene)bis(benzoic acid), Htrz = 1H-1,2,3-triazole; H<sub>2</sub>L= 8-hydroxyquinolate derivative.

**Table S6.** Comparison of the sensitivities of **3** with previously reported MOFs toCr<sub>2</sub>O<sub>7</sub><sup>2-</sup> ions

| MOFs                                                                                                 | LOD/M                    | Ref       |
|------------------------------------------------------------------------------------------------------|--------------------------|-----------|
| {[Co <sub>1.5</sub> (TBIP) <sub>1.5</sub> (L)]·0.5H <sub>2</sub> O} <sub>n</sub>                     | 2.09×10 <sup>-4</sup>    | [6]       |
| {[Cd <sub>2</sub> (L)(DMA)]·[H <sub>2</sub> N(Me) <sub>2</sub> ]} <sub>n</sub>                       | 2.54 × 10 <sup>-3</sup>  | [4]       |
| Zr <sub>6</sub> O <sub>4</sub> (OH) <sub>7</sub> (H <sub>2</sub> O) <sub>3</sub> (BTBA) <sub>3</sub> | 1.5×10 <sup>-6</sup>     | [8]       |
| <b>2</b>                                                                                             | 1.99× 10 <sup>-5</sup> M | This work |

L = 1,3-bis(5,6-dimethylbenzimidazol-1-yl)propane, and H<sub>2</sub>TBIP = 5-tert-butylisophthalic acid; H<sub>5</sub>L= 2,4-

di(3,5dicarboxylphenyl)benzoic acid; H<sub>3</sub>BTBA=4,4',4''-(1Hbenzo[d]imidazole-2,4,7-triyl)tribenzoic acid.

**Fig. S1.** (a) The DCTP<sup>2-</sup> anions create a 1D infinite [Cd(DCTP)]<sub>n</sub> chain by linking adjacent Cd<sup>II</sup> ions in **1**; the binuclear [Cd<sub>2</sub>(L)<sub>2</sub>] unit was formed by L1 ligands and Cd<sup>II</sup> atoms; (c) the 3D supramolecular network of **1** formed by two hydrogen bonds interactions (Pink dotted line).

**Fig. S2.** (a) two varying 1D chains, named as [(Cd1)(Cd2)(L2)]<sub>n</sub>, [(Cd3)(Cd4)(L2)]<sub>n</sub> were formed by L2 ligands and Cd<sup>II</sup> atoms in **2**; (b) Two 1D “V” like chains ([Cd1)(Cd4)(DCTP)]<sub>n</sub> and [(Cd2)(Cd3)(DCTP)]<sub>n</sub> with the surrounding Cd<sup>II</sup> centers in **2** (c) the 3D supramolecular network of **2** formed by two hydrogen bonds interactions (pink dotted line).

**Fig. S3.** (a) The DCTP<sup>2-</sup> anions connect the adjacent Cd<sup>II</sup> ions using these two coordination modes in **3**; (b) The μ<sub>3</sub>-bridging L3 ligands adopt the *cis*-conformation to form a rhombus unit [Cd<sub>4</sub>(L3)<sub>2</sub>] in **3**. (c) 3,3,4,5-connected topology of **3** (the green, blue and red nodes represent Cd<sup>II</sup> center, L3 ligands and DCTP<sup>2-</sup> anions, respectively).

**Fig. S4.** (a) Two different DCTP<sup>2-</sup> anions link adjacent Cd<sup>II</sup> atoms to form a 1D infinite chain [Cd(DCTP)]<sub>n</sub> in **4**; (b) 2D network [Cd(L4)]<sub>n</sub> is formed by using μ<sub>3</sub>-bridging L4 ligands with a *cis*-conformation fashion to connect Cd<sup>II</sup> ions; (c) an rarely 2-nodal (3,5)-connected **gra** topological network of **4** (the green and blue represent Cd<sup>II</sup> center and L3 ligands, respectively).

**Fig. S5.** (a) 1D “V” like chains, named as **1D** [Cd(L5)]<sub>n</sub> is formed by L5 ligands and Cd<sup>II</sup> atoms in **5**; (b) 1D “V” like chains [Cd(DCTP)]<sub>n</sub> is formed by DCTP<sup>2-</sup> ligands and Cd<sup>II</sup> atoms in **5**.

**Fig. S6.** The infrared spectrum of Cd-MOFs **1–5**.

**Fig. S7.** The PXRD pattern of the bulk sample is consistent with the simulated pattern of the single crystal structure in Cd-MOFs **1–5**.

**Fig. S8.** Solid luminescence lifetime of Cd-MOFs **1–5**.

**Fig. S9.** Time-dependent emission spectra of **2** (a) and **3** (b) suspended in aqueous solutions.

**Fig. S10.** PXRD patterns of **2** and **3** under simulated conditions.

**Fig. S11.** The change of the fluorescence emission intensity of **2** (a) and **3** (b) in different pH solutions.

**Fig. S12.** The PXRD patterns of **2** (a) and **3** (b) were measured in different solvents.

**Fig. S13.** Spectral overlap between the absorption spectra of acac ions and the excitation spectra of **2** and **3**.

**Fig. S14.** In **2**, the time required for the quenching efficiency of  $\text{Fe}^{3+}$  ions to reach the maximum.

**Fig. S15.** The PXRD patterns of **2** sample was immersed in EtOH/ $\text{H}_2\text{O}$  solution containing  $\text{Fe}^{3+}$  ions and other common cations.

**Fig. S16.** Spectral overlap between the absorption spectra of  $\text{Fe}^{3+}$  ions and the excitation spectra of **2**.

**Fig. S17.** In **3**, the time required for the quenching efficiency of  $\text{Cr}_2\text{O}_7^{2-}$  anions to reach the maximum.

**Fig. S18.** The PXRD patterns of **3** sample was immersed in EtOH/ $\text{H}_2\text{O}$  solution containing  $\text{Cr}_2\text{O}_7^{2-}$  anions and other common anions.

**Fig. S19.** Spectral overlap between the absorption spectra of  $\text{Cr}_2\text{O}_7^{2-}$  anions and the excitation spectra of **3**.

**Fig. S20.** TGA curves of Cd-MOFs **1–5**.

**Fig. S21.** Comparison of the quenching efficiency of **2** for sensing acac/ $\text{Fe}^{3+}$ , and **3** for acac/ $\text{Cr}_2\text{O}_7^{2-}$  over three cycles.

**Fig. S22.** (a) Effects of pH on the fluorescence maxima of **2** + acac (circle) and **2** +  $\text{Fe}^{3+}$  (triangle); (a) Effects of pH on the fluorescence maxima of **3** + acac (circle) and **3** +  $\text{Cr}_2\text{O}_7^{2-}$  (triangle). Solvent: EtOH/ $\text{H}_2\text{O}$  (1:1, v/v).

**Fig. S23.** The EDX patterns of **2** and **3**; **2** + acac, **3** + acac; **2** +  $\text{Fe}^{3+}$ , **3** +  $\text{Cr}_2\text{O}_7^{2-}$ , respectively.

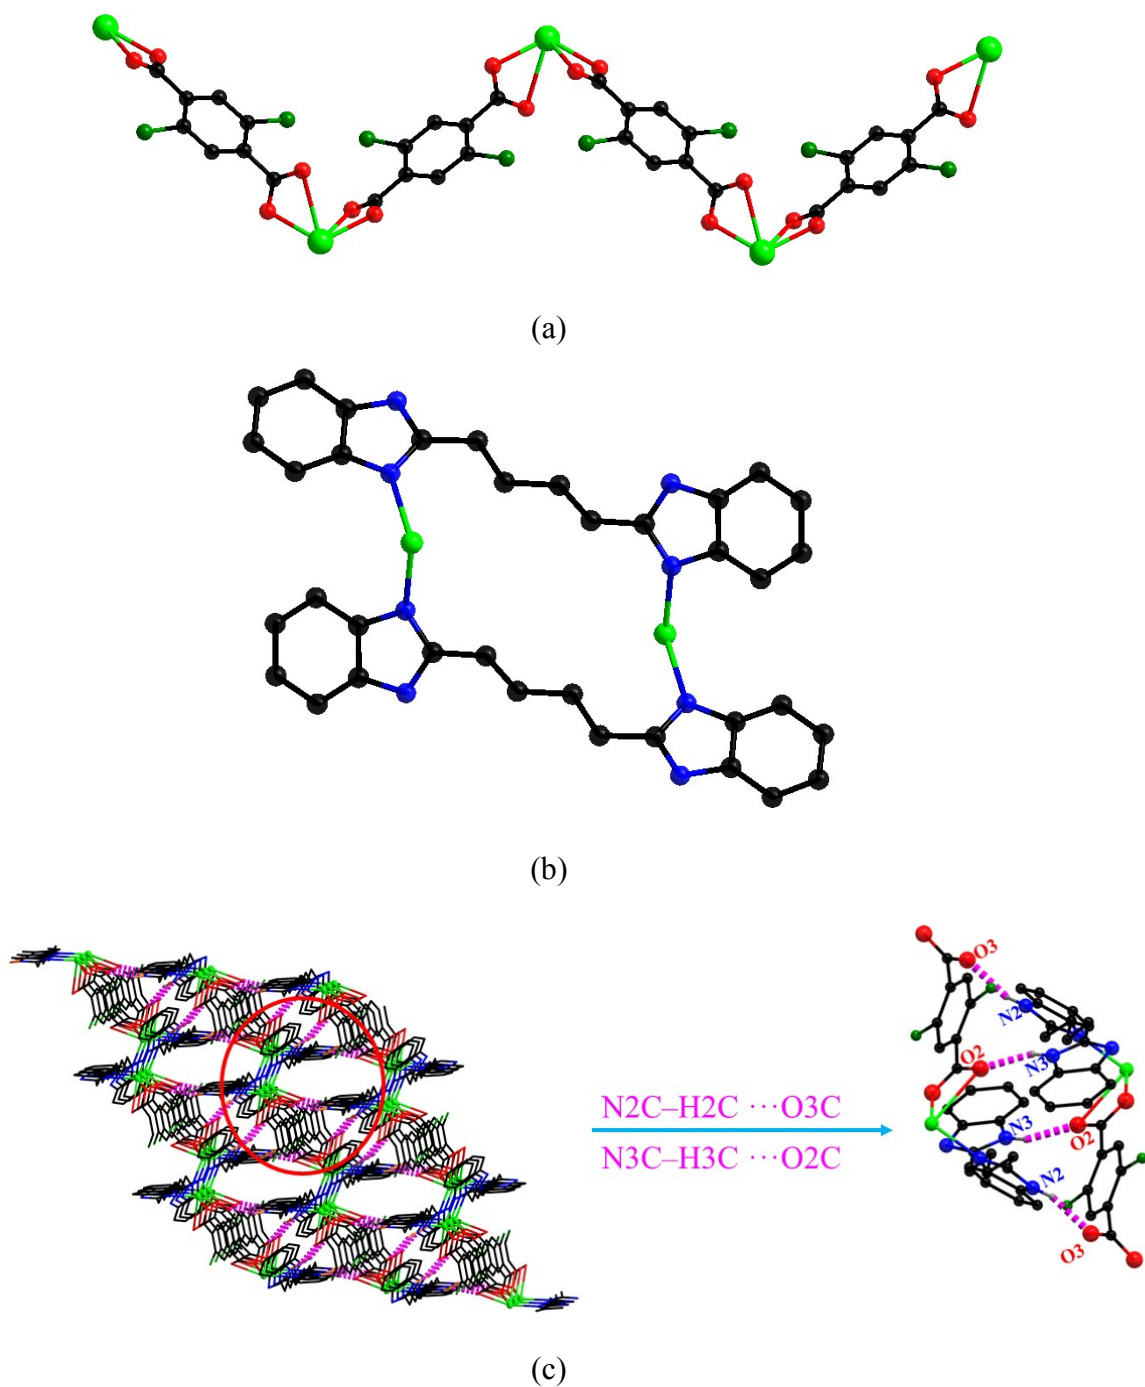

**Fig. S1.** (a) The  $\text{DCTP}^{2-}$  anions create a 1D infinite  $[\text{Cd}(\text{DCTP})]_n$  chain by linking adjacent  $\text{Cd}^{\text{II}}$  ions in **1**; the binuclear  $[\text{Cd}_2(\text{L1})_2]$  unit was formed by L1 ligands and  $\text{Cd}^{\text{II}}$  atoms; (c) the 3D supramolecular network of **1** formed by two hydrogen bonds interactions (Pink dotted line).

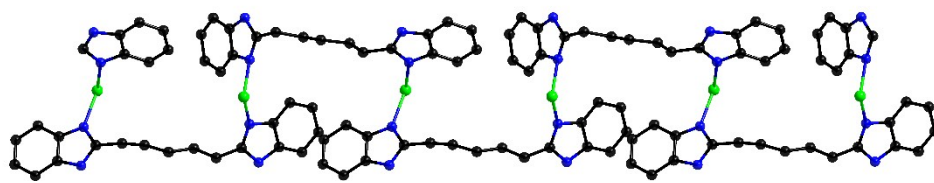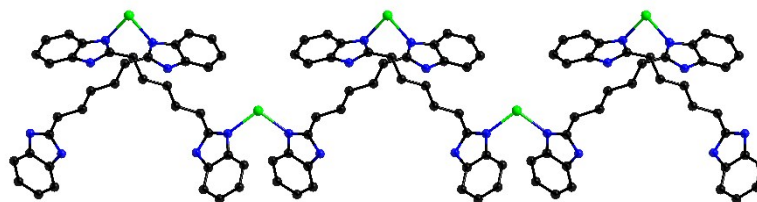

(a)

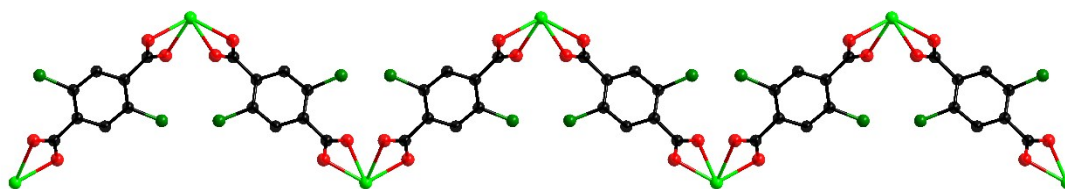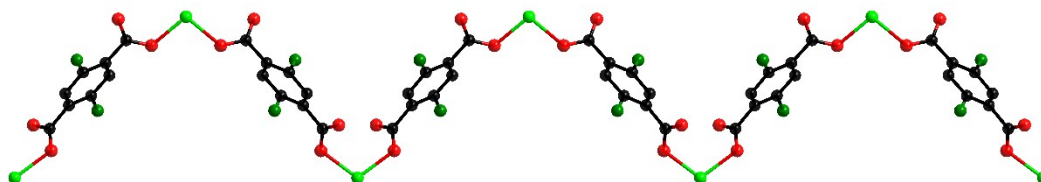

(b)

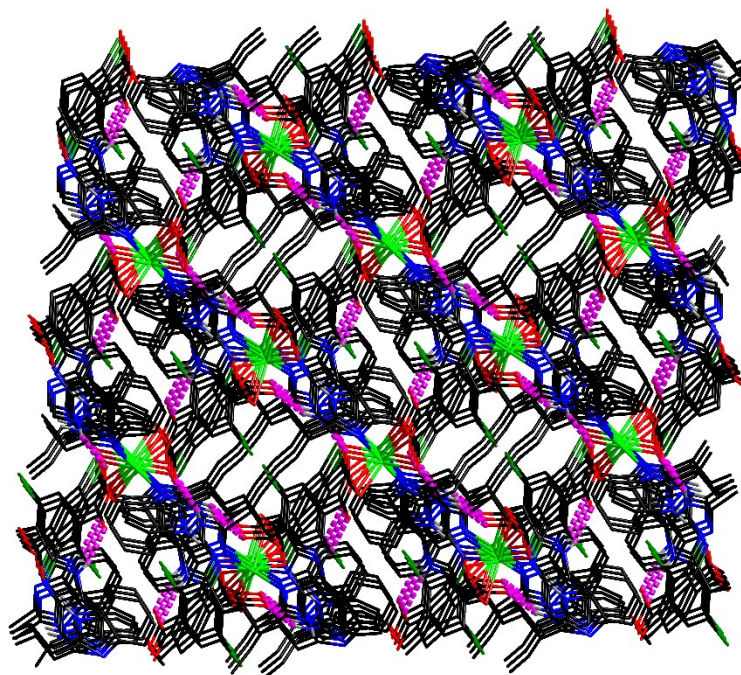

(c)

**Fig. S2.** (a) two varying 1D chains, named as  $[(\text{Cd1})(\text{Cd2})(\text{L2})]_n$ ,  $[(\text{Cd3})(\text{Cd4})(\text{L2})_2]_n$  were formed by L2 ligands and  $\text{Cd}^{\text{II}}$  atoms in **2**; (b) Two 1D “V” like chains(  $[(\text{Cd1})(\text{Cd4})(\text{DCTP})]_n$  and  $[(\text{Cd2})(\text{Cd3})(\text{DCTP})]_n$ ) with the surrounding  $\text{Cd}^{\text{II}}$  centers in **2** (c) the 3D supramolecular network of **2** formed by two hydrogen bonds interactions (pink dotted line).



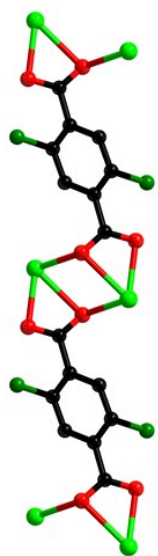

Mode I

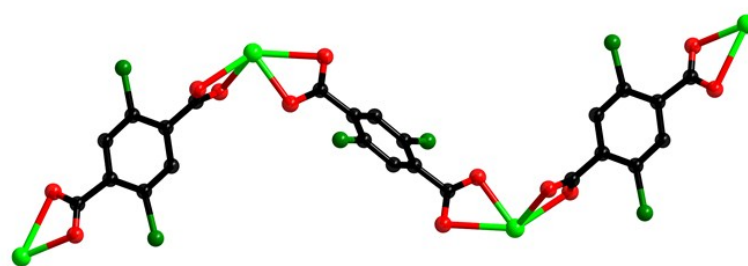

Mode II

(a)

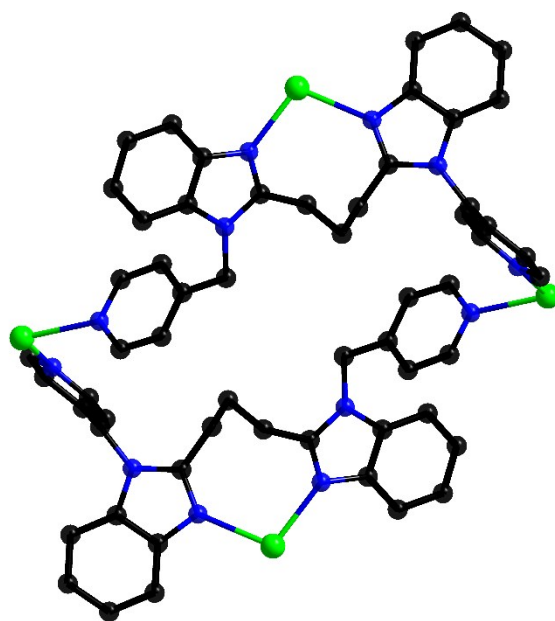

(b)

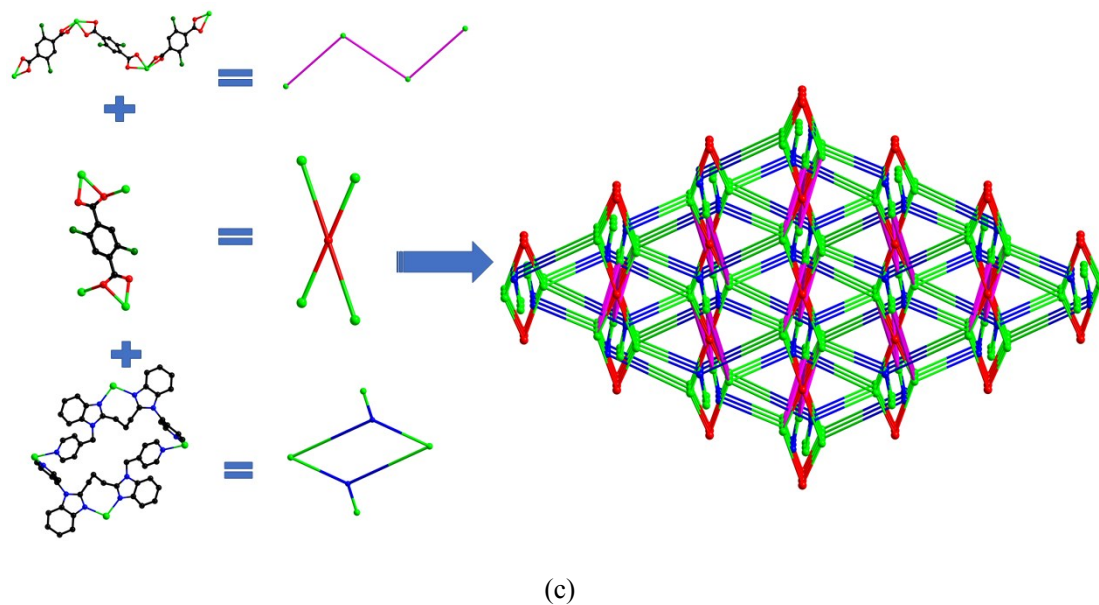

**Fig. S3.** (a) The  $\text{DCTP}^{2-}$  anions connect the adjacent  $\text{Cd}^{\text{II}}$  ions using these two coordination modes in **3**; (b) The  $\mu_3$ -bridging L3 ligands adopt the *cis*-conformation to form a rhombus unit  $[\text{Cd}_4(\text{L3})_2]$  in **3**. (c) 3,3,4,5-connected topology of **3** (the green, blue and red nodes represent  $\text{Cd}^{\text{II}}$  center, L3 ligands and  $\text{DCTP}^{2-}$  anions, respectively).

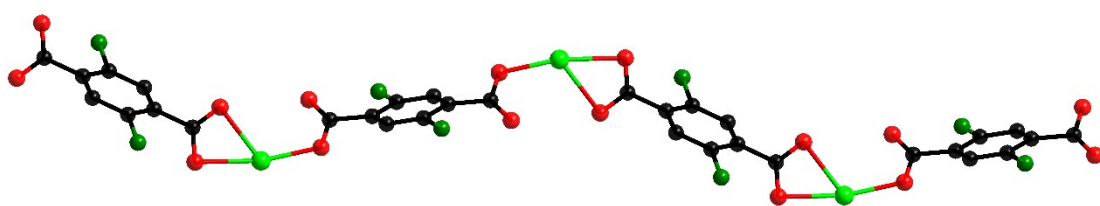

(a)

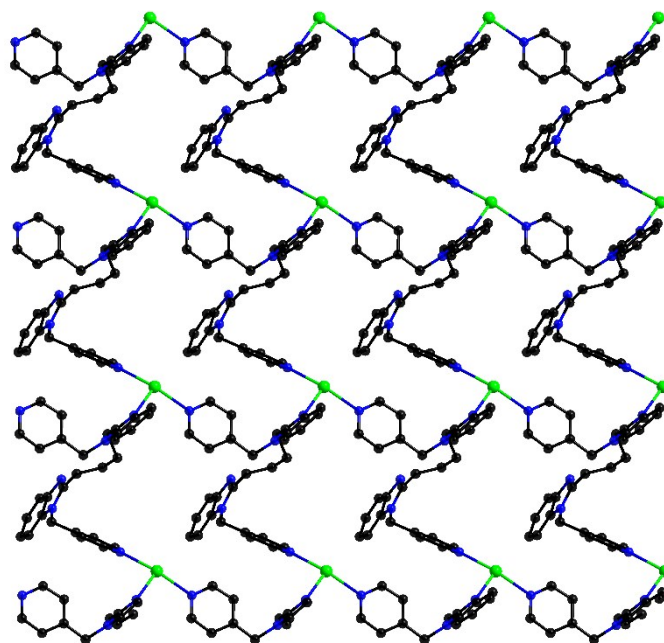

(b)

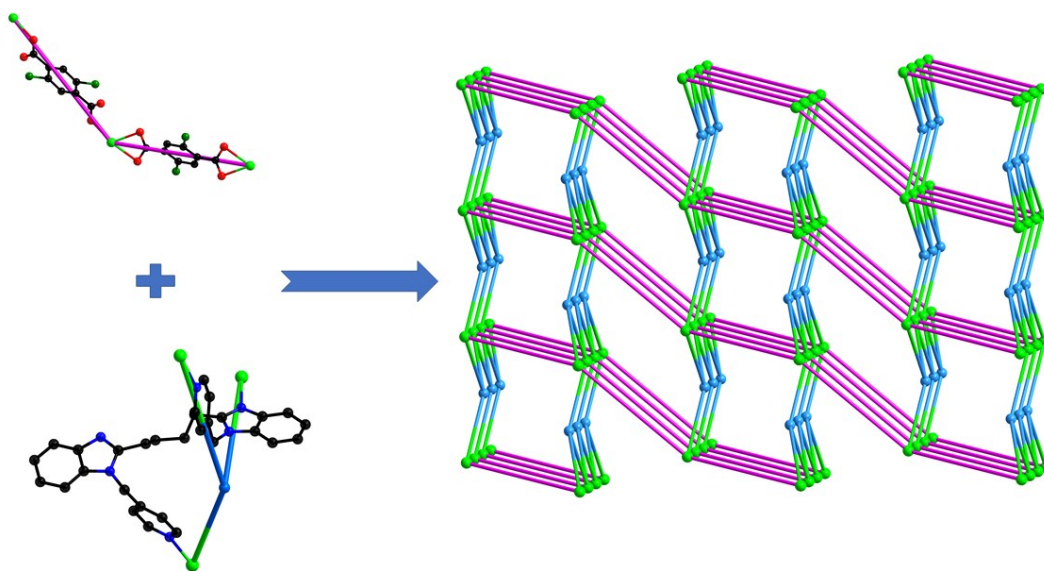

(c)

Fig. S4. (a) Two different DCTP<sup>2-</sup> anions link adjacent Cd<sup>II</sup> atoms to form a 1D infinite chain

[Cd(DCTP)]<sub>n</sub> in **4**; (b) 2D network [Cd(L4)]<sub>n</sub> is formed by using  $\mu_3$ -bridging L4 ligands with a *cis*-conformation fashion to connect Cd<sup>II</sup> ions; (c) an rarely 2-nodal (3,5)-connected **gra** topological network of **4** (the green and blue represent Cd<sup>II</sup> center and L3 ligands, respectively).

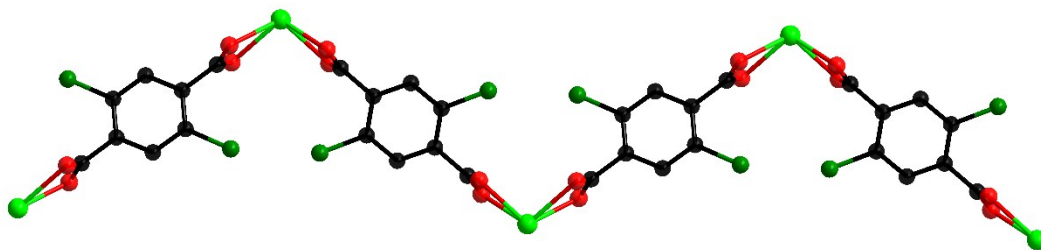

(a)

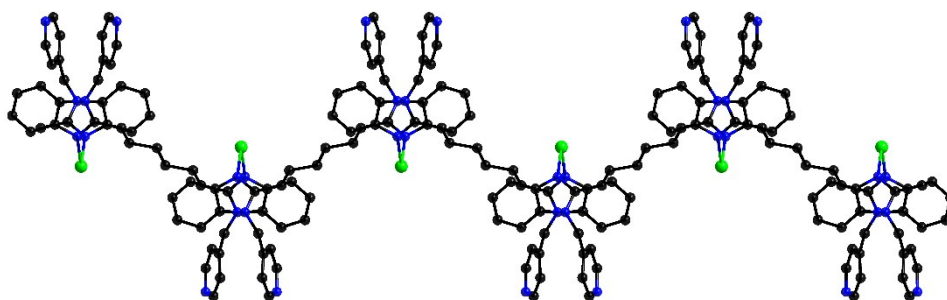

(b)

**Fig. S5.** (a) 1D “V” like chains, named as **1D**  $[\text{Cd}(\text{L5})]_n$  is formed by L5 ligands and  $\text{Cd}^{\text{II}}$  atoms in **5**; (b) 1D “V” like chains  $[\text{Cd}(\text{DCTP})]_n$  is formed by  $\text{DCTP}^{2-}$  ligands and  $\text{Cd}^{\text{II}}$  atoms in **5**.

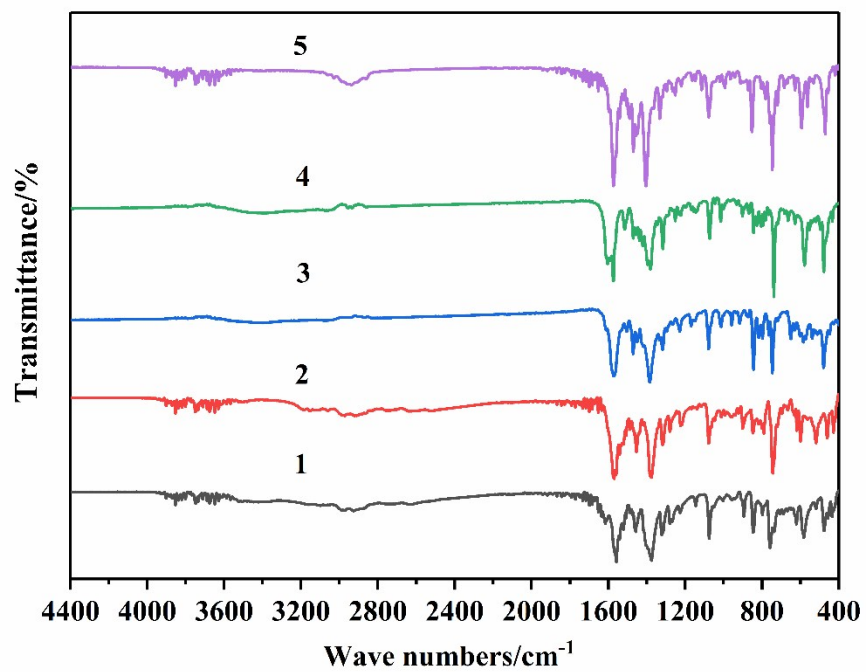

**Fig. S6.** The infrared spectrum of Cd-MOFs 1–5.

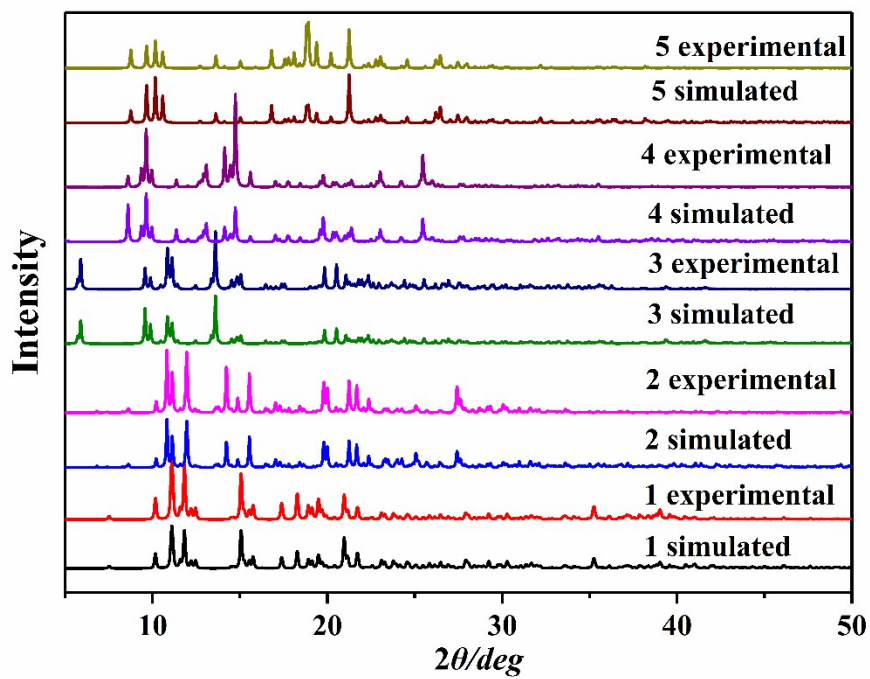

**Fig. S7.** The PXRD pattern of the bulk sample is consistent with the simulated pattern of the single crystal structure in Cd-MOFs 1–5.

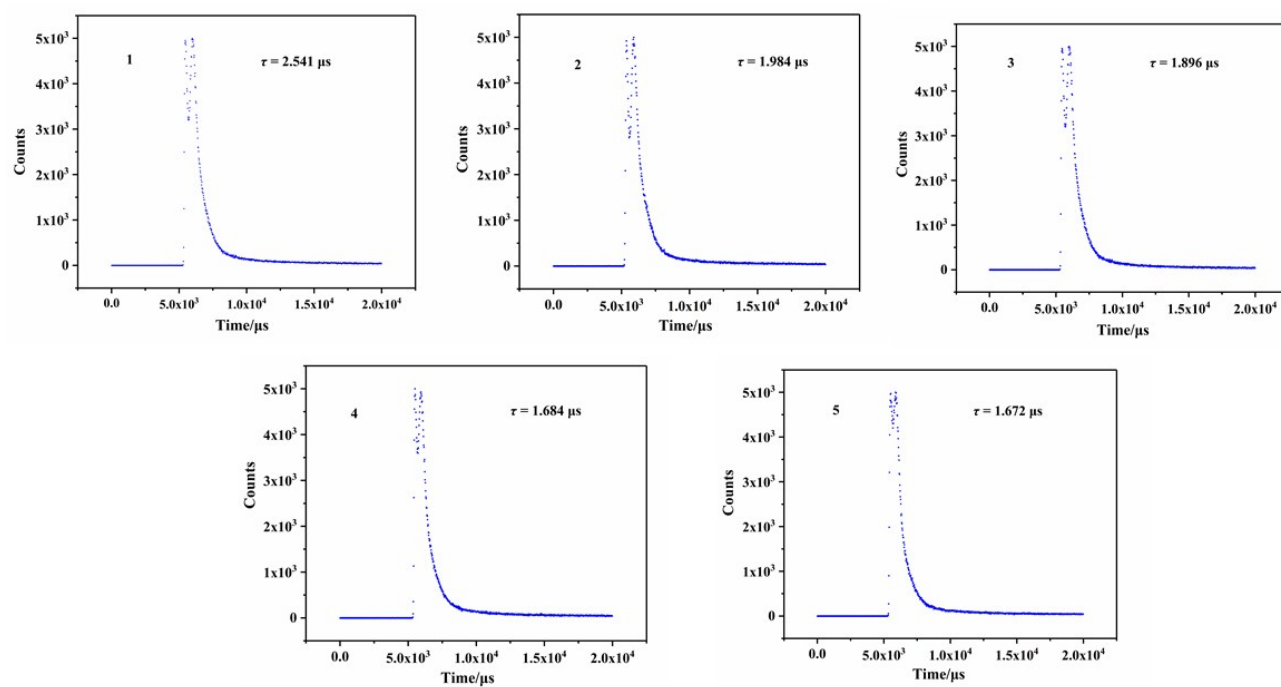

**Fig. S8.** Solid luminescence lifetime of Cd-MOFs 1–5.



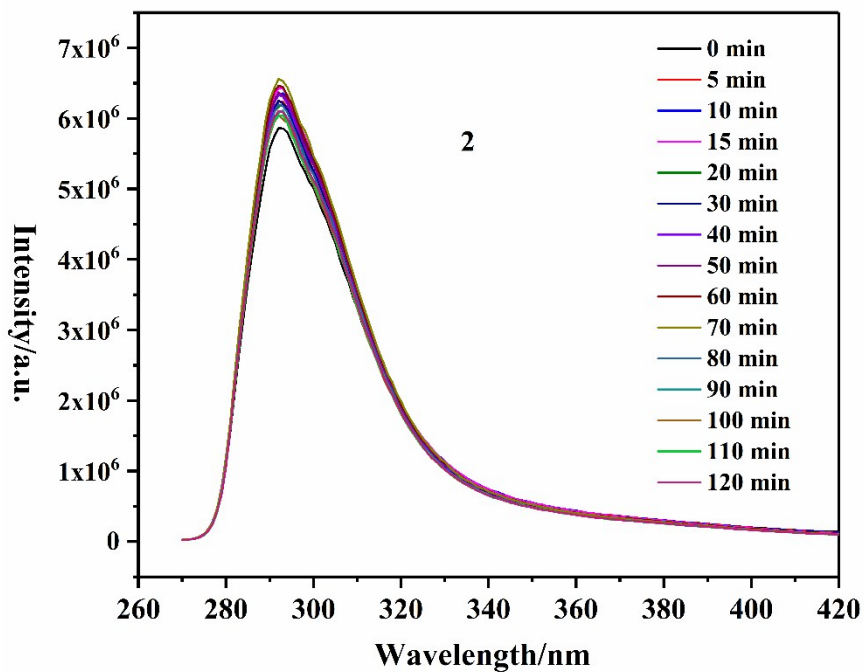

(a)

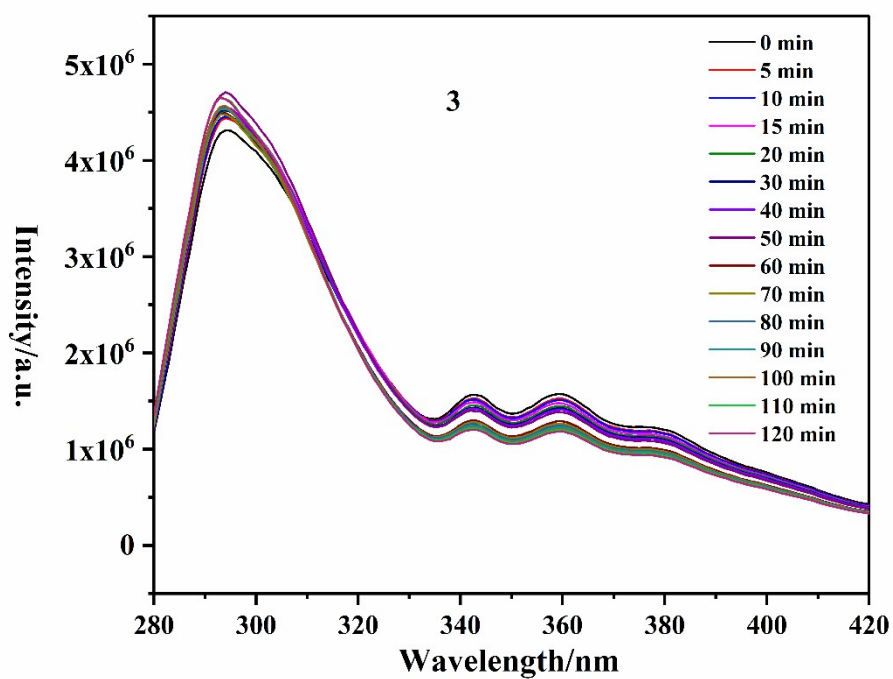

(b)

**Fig. S9.** Time-dependent emission spectra of **2** (a) and **3** (b) suspended in aqueous solutions.

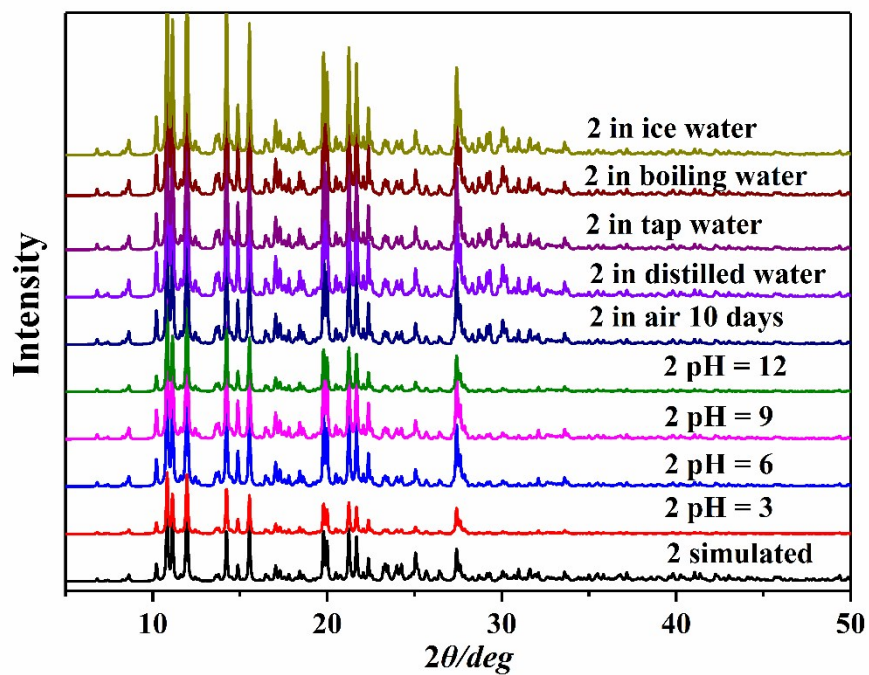

(a)

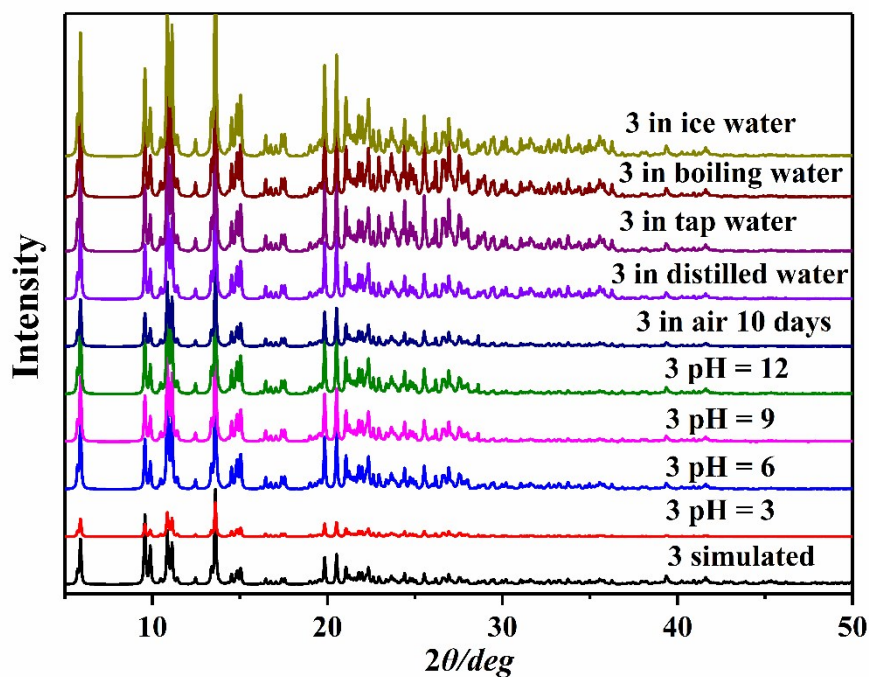

Fig. S10. PXRD patterns of 2 and 3 under simulated conditions.

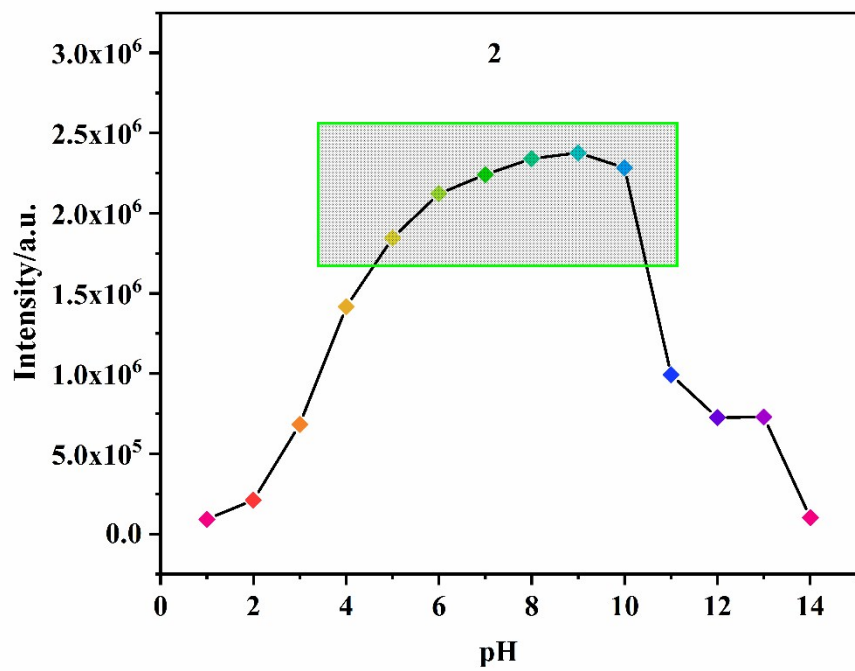

(a)

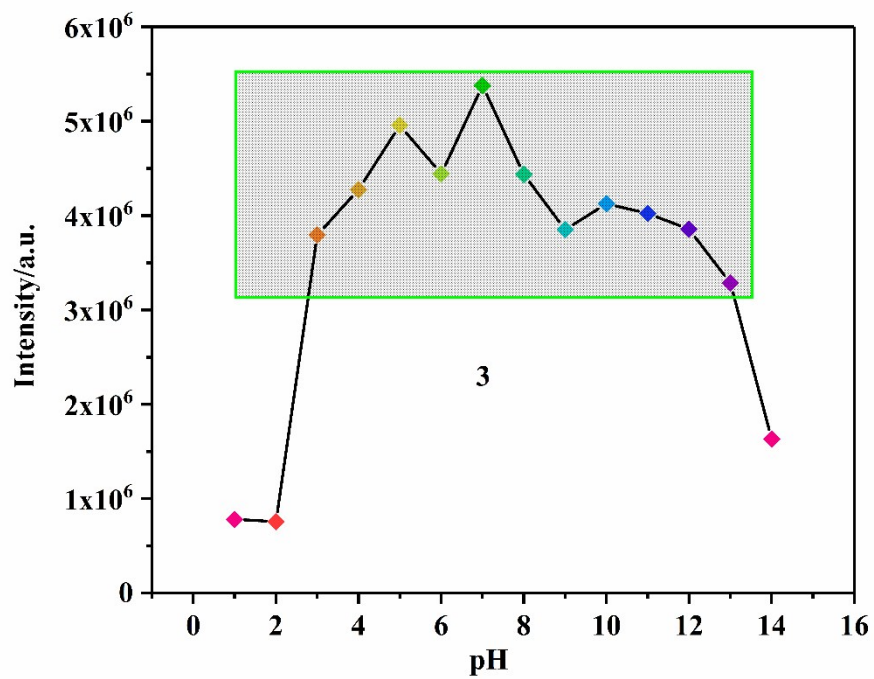

(b)

**Fig. S11.** The change of the fluorescence emission intensity of 2 (a) and 3 (b) in different pH solutions.

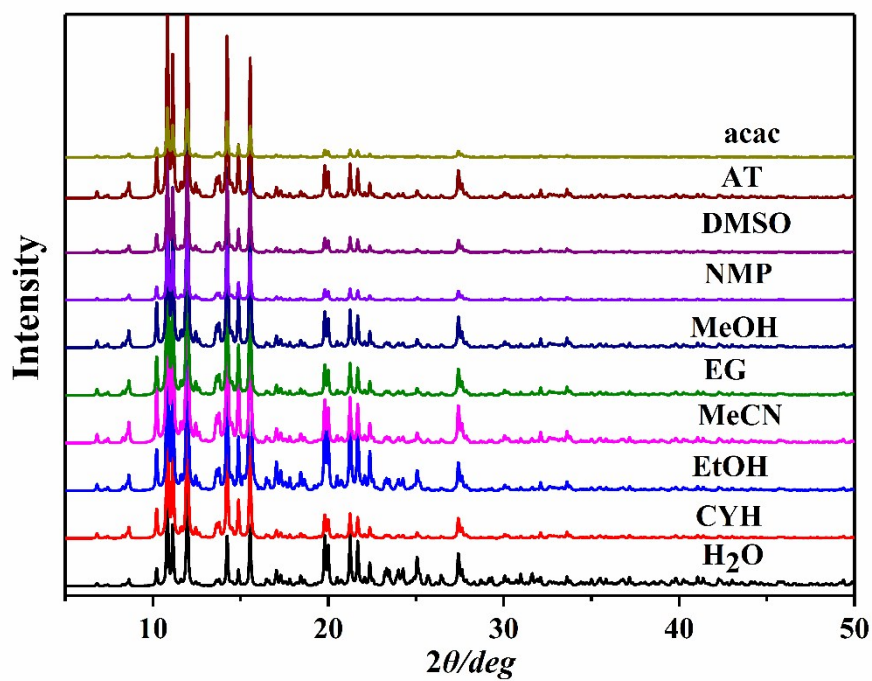

(a)

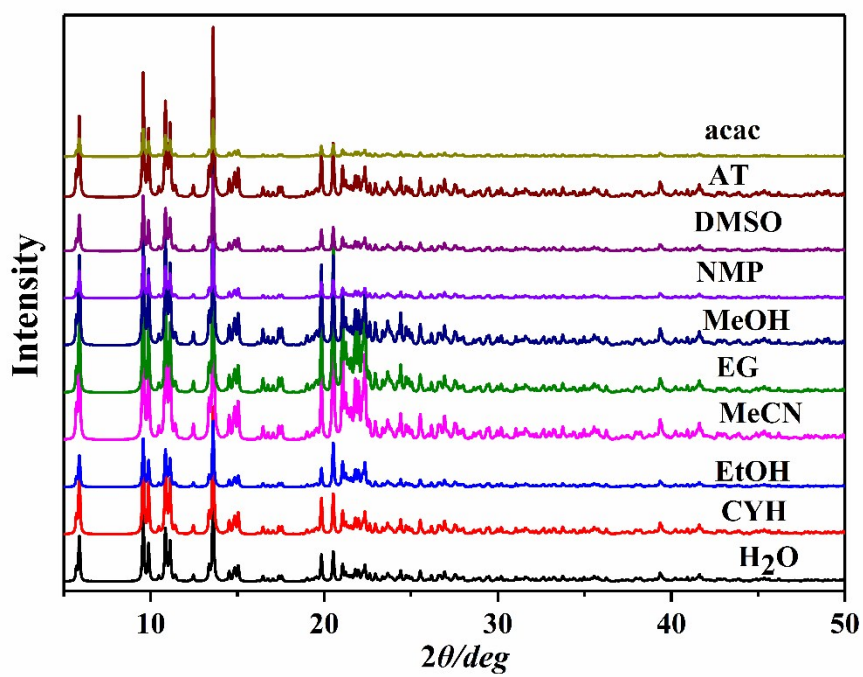

(b)

**Fig. S12.** The PXR D patterns of 2 (a) and 3 (b) were measured in different solvents.

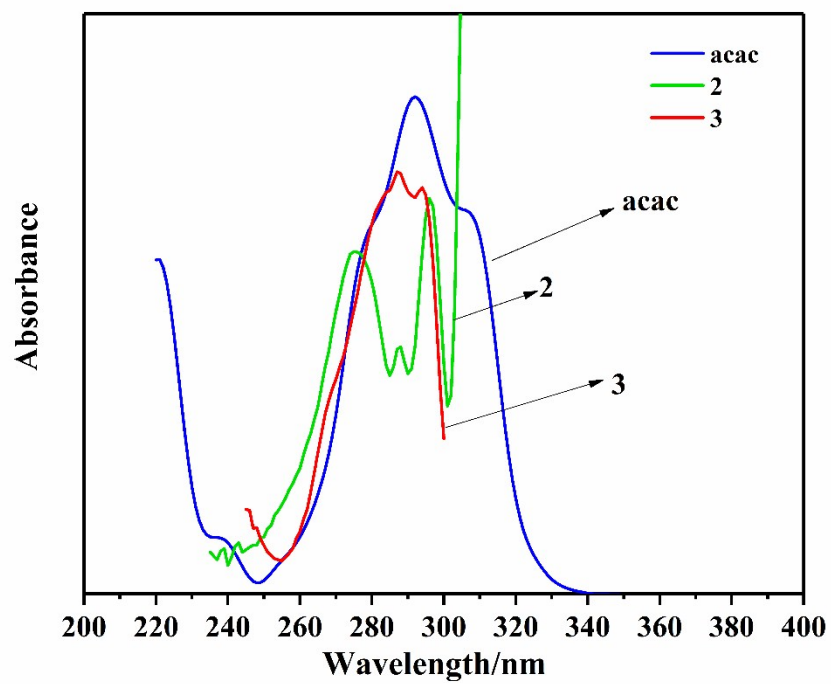

**Fig. S13.** Spectral overlap between the absorption spectra of acac ions and the excitation spectra of 2 and 3.

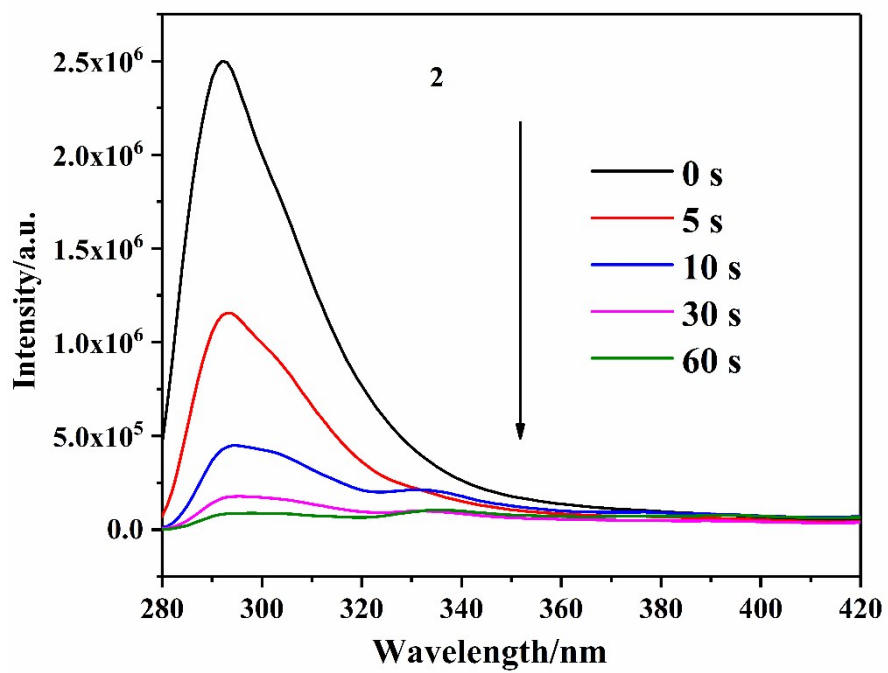

Fig. S14. In 2, the time required for the quenching efficiency of  $\text{Fe}^{3+}$  ions to reach the maximum.

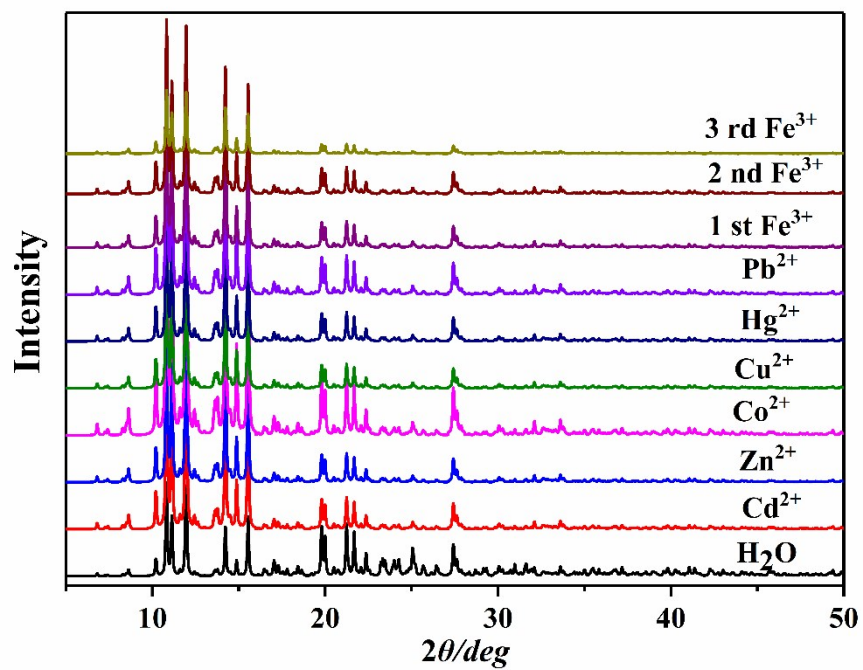

**Fig. S15.** PXR D patterns of **2** (samples were immersed in EtOH/H<sub>2</sub>O solution containing Fe<sup>3+</sup> ions and other common cations).

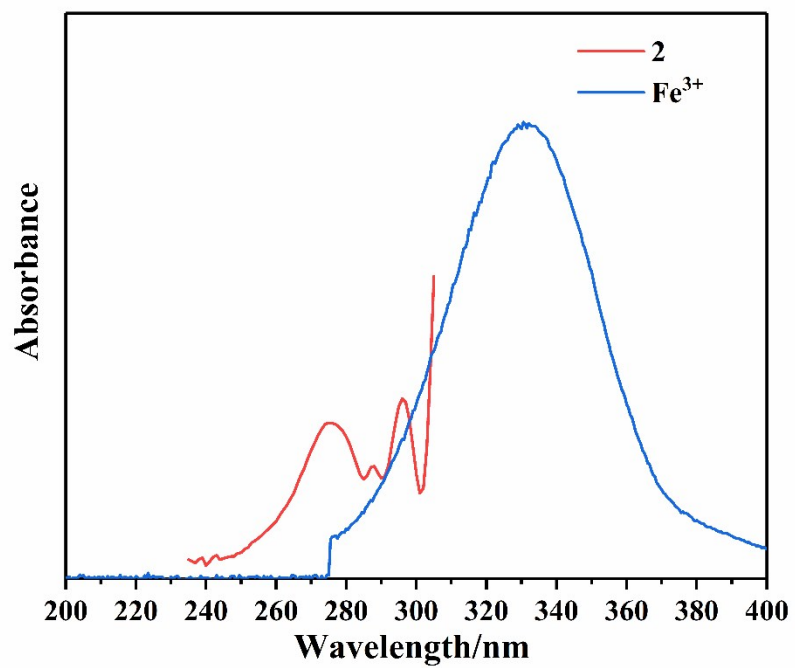

**Fig. S16.** Spectral overlap between the absorption spectra of Fe<sup>3+</sup> ions and the excitation spectra of **2**.



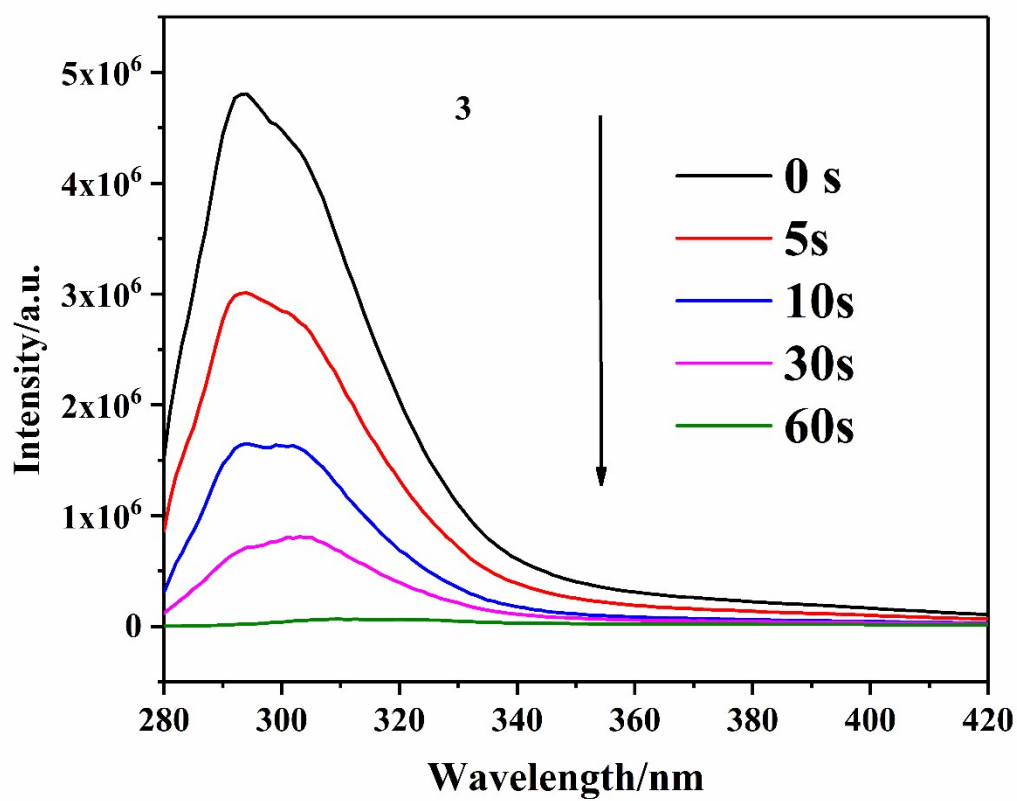

Fig. S17. In 3, the time required for the quenching efficiency of  $\text{Cr}_2\text{O}_7^{2-}$  anions to reach the maximum.

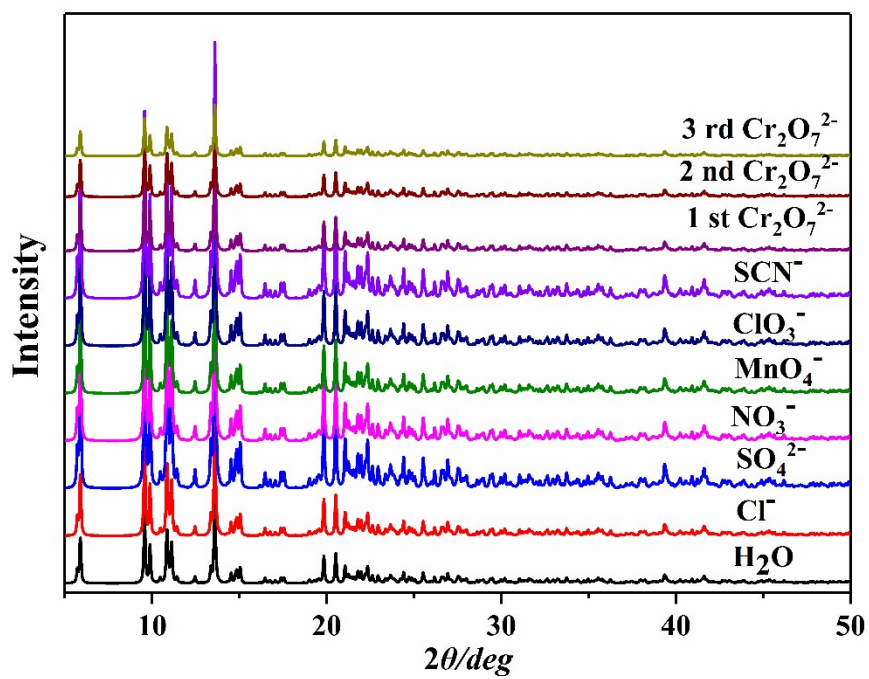

**Fig. S18.** The PXRD patterns of **3** sample was immersed in EtOH/H<sub>2</sub>O solution containing Cr<sub>2</sub>O<sub>7</sub><sup>2-</sup> anions and other common anions.

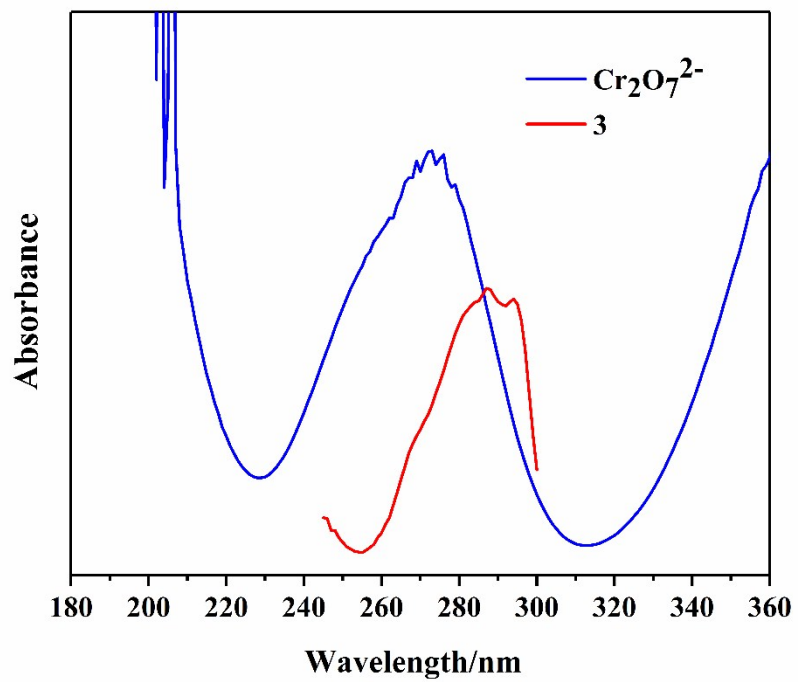

**Fig. S19.** Spectral overlap between the absorption spectra of  $\text{Cr}_2\text{O}_7^{2-}$  anions and the excitation spectra of **3**.

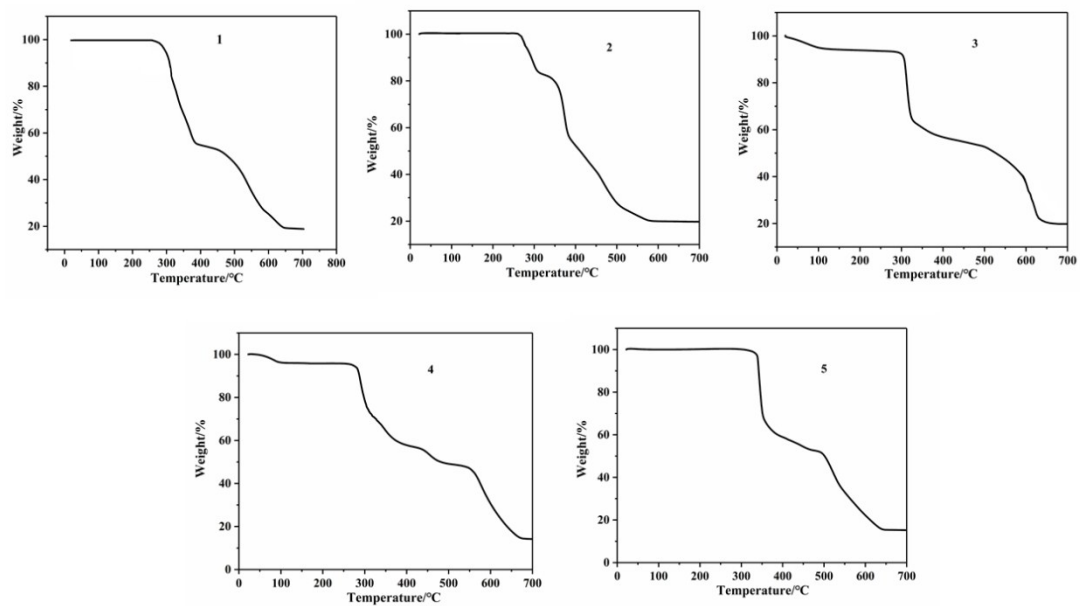

**Fig. S20.** TGA curves of Cd-MOFs 1–5.

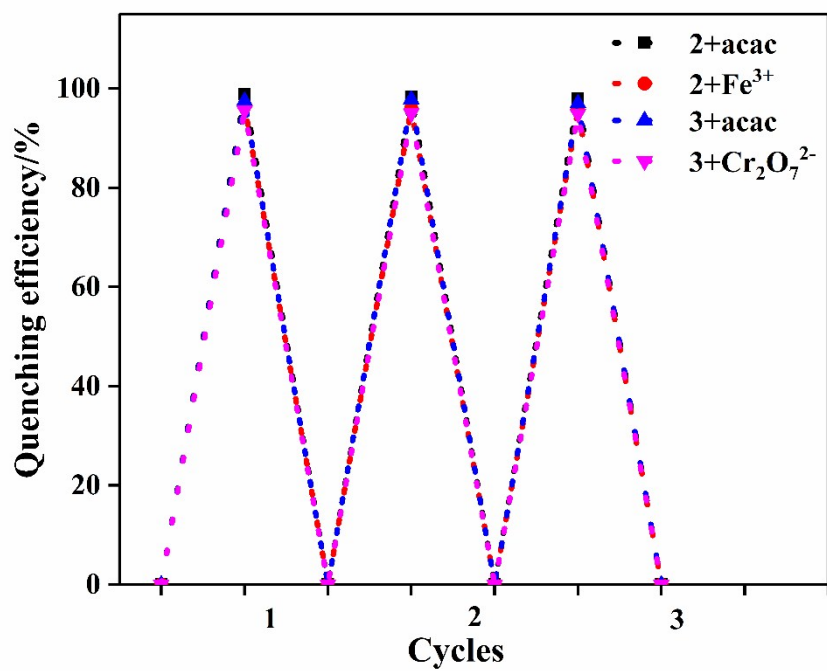

**Fig. S21.** Comparison of the quenching efficiency of **2** for sensing acac/Fe<sup>3+</sup>, and **3** for acac/Cr<sub>2</sub>O<sub>7</sub><sup>2-</sup> over three cycles.

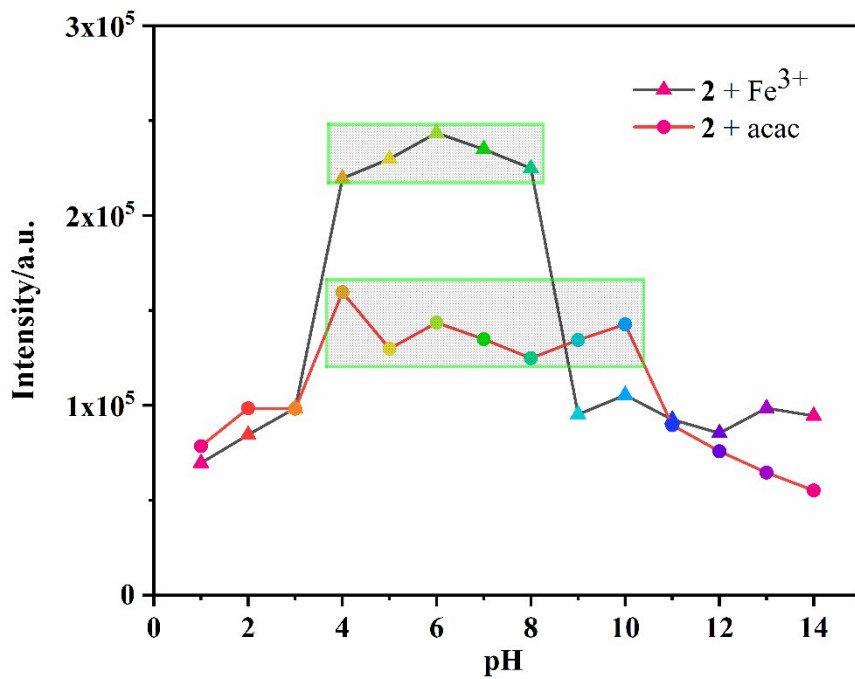

(a)

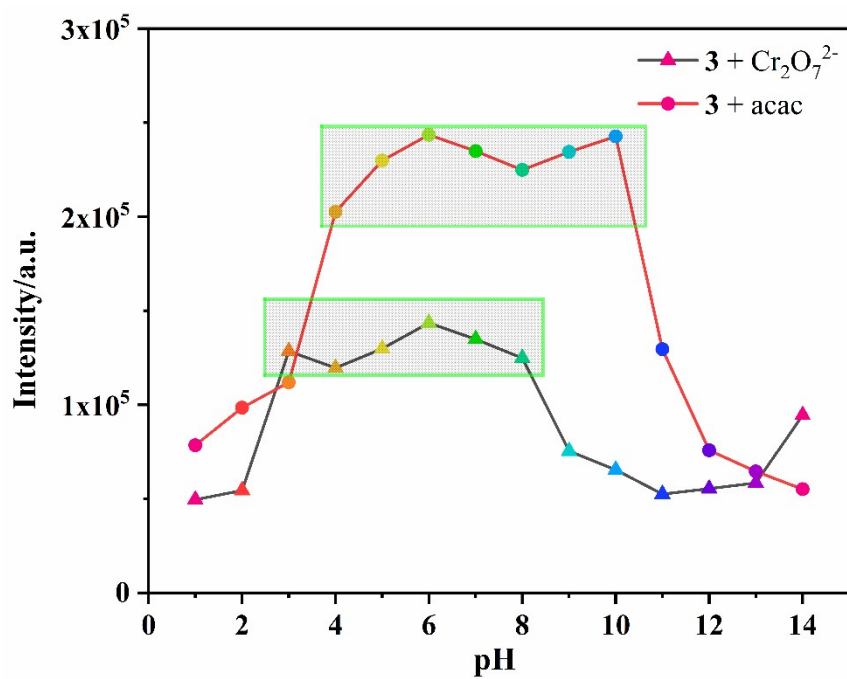

(b)

**Fig. S22.** (a) Effects of pH on the fluorescence maxima of **2** + acac (circle) and **2** + Fe<sup>3+</sup> (triangle); (a) Effects of pH on the fluorescence maxima of **3** + acac (circle) and

**3** +  $\text{Cr}_2\text{O}_7^{2-}$  (triangle). Solvent: EtOH/H<sub>2</sub>O (1:1, v/v).

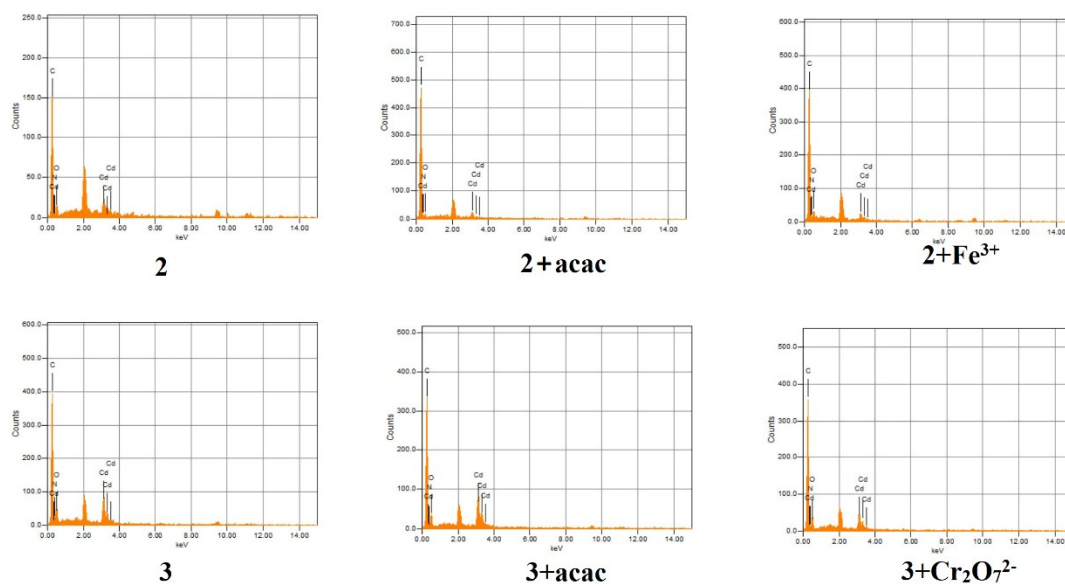

**Fig. S23.** The EDX patterns of **2** and **3**; **2** + acac, **3** + acac; **2** + Fe<sup>3+</sup>, **3** + Cr<sub>2</sub>O<sub>7</sub><sup>2-</sup>, respectively.
